# Supplementary material
Source: ML conference proceedings conference paper supplement (https://openaccess.thecvf.com/content/WACV_2020/html/Parida_Coordinated_Joint_Multimodal_WACV_2020_paper.html)
Supplement: Supplementary file 1 [file Parida_Coordinated_Joint_Multimodal_WACV_2020_supplemental.pdf]

Archive with 11 entries (8 files):
- 0354-supp/
- 0354-supp/.DS_Store
- __MACOSX/
- __MACOSX/0354-supp/
- __MACOSX/0354-supp/._.DS_Store
- 0354-supp/modality_prediction.mp4
- __MACOSX/0354-supp/._modality_prediction.mp4
- 0354-supp/retrieval_results.mp4
- __MACOSX/0354-supp/._retrieval_results.mp4
- 0354-supp/0354-supp.pdf
- __MACOSX/0354-supp/._0354-supp.pdf
