# Supplementary material
Source: ML conference proceedings conference paper supplement (https://openaccess.thecvf.com/content/WACV_2020/html/Parida_Coordinated_Joint_Multimodal_WACV_2020_paper.html)
Supplement: Supplementary file 1 [file Parida_Coordinated_Joint_Multimodal_WACV_2020_supplemental.pdf › 0354-supp/0354-supp.pdf]

## Supplementary Material

# Coordinated Joint Multimodal Embeddings for Generalized Audio-Visual Zeroshot Classification and Retrieval of Videos

Kranti Kumar Parida  
IIT Kanpur

Neeraj Matiyali  
IIT Kanpur

Tanaya Guha  
University of Warwick

Gaurav Sharma  
NEC Labs America

### 1. Difference with previously claimed zero-shot video retrieval approach

There have been some earlier works [1, 2] that claimed to be zero-shot video retrieval but their definition of zero-shot is different from the contemporary meaning [3]. In these earlier works of zero-shot, there is no separation of seen and unseen class queries, which clearly violates the contemporary meaning of zero-shot.

The authors claim these works to be zero-shot as there is no pairing between the query and the example retrieval lists in the training set. In order to learn from the unpaired dataset, 'concept' detectors (e.g. airplanes, bicycles, church, computers) are used separately for both the modalities to extract the concepts. The extracted concepts are finally aligned for cross-modal retrieval. However, these concept detectors are pre-trained on external annotated datasets (e.g. ImageNet, UCF101) which means that their models have already seen the concepts prior to testing.

This again violates the contemporary setting of zero-shot where no pre-training is allowed for the unseen data.

Our definition of zero-shot is aligned with the more recent and strict definition [3], where the unseen query concept class examples are never seen during training (i.e. even pre-trained detectors are not allowed). Hence, our approach of zero-shot is different from the previously claimed approach and can not be compared directly with them.

### 2. Dataset

In this section we give more details about the dataset, AudioSetZSL as mentioned in Section. 4 of the paper. The statistics for different splits of the dataset is given in Table. 1. The number of examples in the *seen* and *unseen* classes is given in Table. 2 and the number of examples in each class of the dataset is shown in Table. 3. We have provided some examples videos from the seen and unseen classes in Fig. 1 and Fig. 2 respectively. As the dataset was collected for the audio task, it can be clearly seen that some of the frame doesn't contain the video as suggested in the

paper. This can be seen for the  $2^{nd}$  examples in the class ambulance.

| split | min | max   | mean    | std. dev. |
|-------|-----|-------|---------|-----------|
| train | 176 | 22989 | 2844.39 | 4615.77   |
| val   | 58  | 7663  | 947.61  | 1538.65   |
| test  | 58  | 7663  | 947.88  | 1538.68   |

Table 1. Statistics on the number of examples per class for the AudioSetZSL dataset.

| class          | train | val   | test  |
|----------------|-------|-------|-------|
| seen classes   | 79795 | 26587 | 26593 |
| unseen classes | 14070 | 4684  | 4687  |
| <b>Total</b>   | 93865 | 31271 | 31280 |

Table 2. No. of examples in seen and unseen classes of the dataset

### References

- [1] J. Dalton, J. Allan, and P. Mirajkar. Zero-shot video retrieval using content and concepts. In *Proceedings of the 22nd ACM international conference on Information & Knowledge Management*, pages 1857–1860. ACM, 2013.
- [2] C. Gan, M. Lin, Y. Yang, G. De Melo, and A. G. Hauptmann. Concepts not alone: Exploring pairwise relationships for zero-shot video activity recognition. In *Thirtieth AAAI Conference on Artificial Intelligence*, 2016.
- [3] Y. Xian, C. H. Lampert, B. Schiele, and Z. Akata. Zero-shot learning-a comprehensive evaluation of the good, the bad and the ugly. *Transactions on Pattern analysis and Machine Intelligence*, 2018.

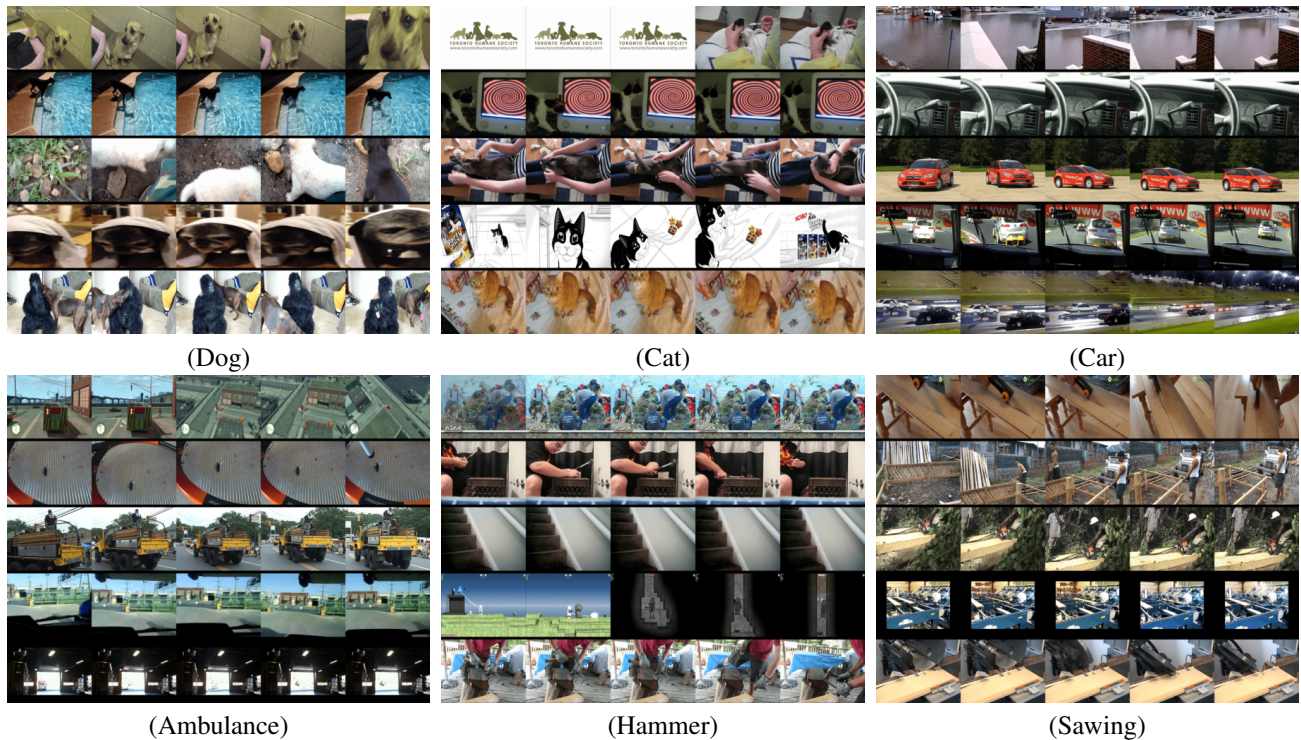

Figure 1. Example videos from **seen classes** of the dataset. The classes are mentioned below each of the figure. Each row in the figure corresponds to an example video, where the frames are extracted at equal intervals from the entire video.

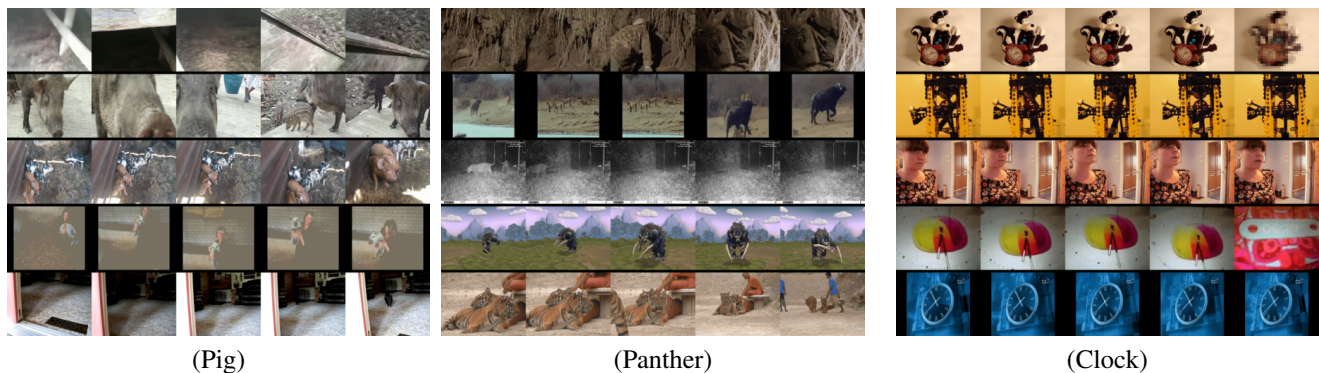

Figure 2. Example videos from **unseen classes** of the dataset. The classes are mentioned below each of the figure. Each row in the figure corresponds to an example video, where the frames are extracted at equal intervals from the entire video.

| class              | train | val   | test  |
|--------------------|-------|-------|-------|
| dog                | 7588  | 2529  | 2529  |
| cat                | 2133  | 710   | 711   |
| horse              | 1862  | 620   | 620   |
| cattle             | 437   | 145   | 145   |
| <b>pig</b>         | 467   | 155   | 156   |
| goat               | 1096  | 365   | 365   |
| <b>panther</b>     | 379   | 126   | 126   |
| bird               | 15092 | 5030  | 5031  |
| thunderstorm       | 192   | 64    | 64    |
| rain               | 1317  | 439   | 439   |
| <b>stream</b>      | 1583  | 527   | 527   |
| ocean              | 1871  | 623   | 623   |
| car                | 22989 | 7663  | 7663  |
| truck              | 5514  | 1837  | 1838  |
| <b>bus</b>         | 2888  | 962   | 962   |
| ambulance          | 2540  | 846   | 846   |
| motorcycle         | 4000  | 1333  | 1333  |
| train              | 5140  | 17113 | 1713  |
| <b>aircraft</b>    | 3104  | 1034  | 1034  |
| bicycle            | 1622  | 540   | 541   |
| skateboard         | 1703  | 567   | 568   |
| <b>clock</b>       | 389   | 129   | 130   |
| sewing             | 1050  | 350   | 350   |
| <b>fan</b>         | 434   | 144   | 144   |
| cashbox            | 176   | 58    | 58    |
| <b>printer</b>     | 1915  | 638   | 638   |
| camera             | 204   | 68    | 68    |
| <b>church-bell</b> | 662   | 220   | 220   |
| hammer             | 260   | 86    | 86    |
| sawing             | 431   | 143   | 143   |
| <b>gunshot</b>     | 2249  | 749   | 750   |
| fireworks          | 1699  | 566   | 566   |
| boom               | 879   | 292   | 293   |
| <b>Total</b>       | 93865 | 31271 | 31280 |

Table 3. Number of examples per class available in the AudioSetZSL dataset. The zero-shot classes are marked with boldface.
